# Modelling the spatial crosstalk between two biochemical signals explains wood formation dynamics and tree-ring structure

Dynamical modelling approach to wood formation control

Félix P. Hartmann<sup>1</sup> ([felix.hartmann@inrae.fr](mailto:felix.hartmann@inrae.fr))  
Corresponding author.  
Phone: +33(0)4 43 76 14 44

Cyrille B. K. Rathgeber<sup>2</sup> ([cyrille.rathgeber@inrae.fr](mailto:cyrille.rathgeber@inrae.fr))

Eric Badel<sup>1</sup> ([eric.badel@inrae.fr](mailto:eric.badel@inrae.fr))

Meriem Fournier<sup>2</sup> ([meriem.fournier@inrae.fr](mailto:meriem.fournier@inrae.fr))

Bruno Moulia<sup>1</sup> ([bruno.moulia@inrae.fr](mailto:bruno.moulia@inrae.fr))

<sup>1</sup> Université Clermont Auvergne, INRAE, PIAF, F-63000 Clermont–Ferrand, France

<sup>2</sup> Université de Lorraine, AgroParisTech, INRAE, Silva, F-54000 Nancy, France

Word count (from Introduction to Acknowledgments): 4,816

Number of tables: 1

Number of figures: 6

Figures 1, 3, 4 should be printed in colour.

Date of submission: 2020-04-01

## Highlight

A dynamical model proves that two interacting signals (auxin, plus a cytokinin or the TDIF peptide) can drive wood formation dynamics and tree-ring structure development in conifers.

## Abstract

In conifers, xylogenesis produces during a growing season a very characteristic tree-ring structure: large thin-walled earlywood cells followed by narrow thick-walled latewood cells. Although many factors influence the dynamics of differentiation and the final dimensions of xylem cells, the associated patterns of variation remain very stable from one year to the next. While radial growth is characterised by an S-shaped curve, the widths of xylem differentiation zones exhibit characteristic skewed bell-shaped curves. These elements suggest a strong internal control of xylogenesis. It has long been hypothesised that much of this regulation relies on a morphogenetic gradient of auxin. However, recent modelling works have shown that while this hypothesis could account for the dynamics of stem radial growth and the zonation of the developing xylem, it failed to reproduce the characteristic tree-ring structure. Here we investigated the hypothesis of a regulation by a crosstalk between auxin and a second biochemical signal, using dynamical modelling. We found that, in conifers, such a crosstalk is sufficient to simulate the characteristic features of wood formation dynamics, as well as the resulting tree-ring structure. In this model, auxin controls cell enlargement rates while another signal (e.g., cytokinin, TDIF) drives cell division and auxin polar transport.

**Keywords:** auxin, cambium, cytokinin, hormone, model, PIN, TDIF, tree ring, wood, xylogenesis

## 1 Introduction

2 Tree radial growth relies on the production of new cells by the cambium and their subsequent  
3 differentiation. This process presents a high level of plasticity, contributing to the ability of trees to  
4 acclimate to changing environmental conditions (Ragni and Greb 2018). Therefore, in the current  
5 context of climate change, increasing attention is paid to the influence of the environmental factors  
6 on wood formation. However, the anatomical structure of conifer tree rings as revealed through  
7 tracheidograms, with their succession of large thin-walled earlywood cells and narrow thick-walled  
8 latewood cells, demonstrates a strikingly stable organisation under contrasting conditions (Balducci  
9 et al. 2016; Kiorapostolou et al. 2018; Cuny et al. 2018). Over one growing season, xylem radial  
10 growth generally follows a typical Gompertz curve, whose parameters depends on internal and  
11 external factors (Camarero et al. 1998; Rossi et al. 2003; Cuny et al. 2012). The monitoring of wood  
12 formation, through microcore samplings along the growing season, reveals that the developing  
13 xylem generally displays a zonation pattern composed of (1) a division zone (or cambial zone *sensu*  
14 *stricto*), where cells grow and divide; (2) an enlargement zone, where cells grow without dividing;  
15 (3) a maturation zone, where non-growing cells undergo secondary wall deposition and wall  
16 lignification; and (4) a mature zone, composed of dead, fully functional xylem cells (Wilson 1984;  
17 Rathgeber et al. 2016). Over the growing season, the width of each zone follows a specific skewed  
18 bell-shape curve (Cuny et al. 2013, 2014, 2015; Balducci et al. 2016).

19 The stability of these dynamic patterns over the growing seasons, and of the resulting tree-ring  
20 structure, suggests a tight internal control of xylem development. This becomes manifest when bark  
21 strips are removed (Brown and Sax 1962; Li and Cui 1988) or when cambial cells are put into  
22 culture (Barnett 1978). Indeed, where spatial organisation disappears, growth becomes exponential,  
23 and a callus is generally formed. A polarity field is thus required to organise the developing xylem  
24 into radial cell file. It is generally considered that this field could be established through the flow of  
25 biochemical signals between the phloem and the xylem. Indeed, the role played by several signals  
26 in the control of wood formation is well-documented (see reviews in Fischer et al. 2019 and Buttò  
27 et al. 2020). The radial distribution of auxin, the most-studied phytohormone, has been measured in  
28 several species and at different times and positions inside the forming wood during the growing  
29 season (Tuominen et al. 1997; Uggla et al. 1996, 1998, 2001), revealing a concentration peak  
30 around the cambial zone that varies in amplitude during the season. Based on these observations,  
31 some authors put forward the “morphogenetic-gradient hypothesis”, according to which the graded  
32 concentration profile of auxin prescribes the width of each zone and, eventually, the final sizes of  
33 produced xylem cells (Sundberg et al. 2000; Bhalerao and Bennett 2003) by specifying the  
34 successive developmental identities of the cells (division and enlargement).

35 However, it has been shown through dynamical modelling that while the morphogenetic-gradient  
36 hypothesis accounts for the shape of the xylem growth curve and for the seasonal dynamics of the  
37 developing xylem zonation, it fails to explain the dimensions of the produced tracheids and the final  
38 structure of the annual ring (Hartmann et al. 2017). As long as it is assumed that a single signal sets  
39 both division and enlargement identities—the core of the morphogenetic-gradient hypothesis—  
40 tracheid dimension patterns do not follow the typical conifer tree-ring structure that is commonly  
41 observed. Another issue was the prediction of unrealistic regular spatial oscillations of high  
42 amplitudes in final cell sizes.

43 In parallel, several models of tree-ring formation have focused on carbon and water resources  
44 (Deleuze and Houllier 1998; Vaganov et al. 2006, 2011; Hölttä et al. 2010; Wilkinson et al. 2015;  
45 Drew and Downes 2015; Schiestl-Aalto et al. 2015). But they all aim to establish relationships  
46 between environmental conditions and radial growth, while paying little attention to the biological  
47 mechanisms involved at the cellular level. More recently, Carteni et al. (2018) developed an  
48 original functional approach and proposed a mechanism linking the seasonal variations in sugar  
49 availability in the cambium to the anatomical structure of tree rings. This model convincingly  
50 reproduces the typical conifer tree-ring structure, but do not fully represent the biological  
51 mechanisms behind tracheid differentiation since primary and secondary wall deposition are not  
52 distinguished. Another strong limitation is that cells grow independently of each other, making the  
53 model unable to capture the coordination of the xylogenesis processes at the tissue scale.

54 While carbon and water availabilities are indispensable for wood formation, a growing body of  
55 experimental works points at the driving role played by hormones and peptides (Etchells et al. 2015;  
56 Immanen et al. 2016; Gursansky et al. 2016; Brackmann et al. 2018; Han et al. 2018; Smetana et  
57 al. 2019). Moreover, the stability of wood formation patterns, despite fluctuating environmental  
58 conditions, suggests an intrinsic regulatory action through biochemical signals, that can be  
59 presumed to be less sensitive than photosynthesis or water transport. Other signals than auxin are  
60 involved, such as the small peptide TDIF from the CLAVATA family, which enters the cambium  
61 from the phloem and maintains vascular stem cells (Hirakawa et al. 2008; Etchells et al. 2015); or  
62 the plant hormone cytokinin, whose regulatory effect on cambial activity has been reported in aspen  
63 (Nieminen et al. 2008). But the full picture of this regulation remains unclear and dynamical models  
64 are needed to disentangle the role played by each signal. In the *Arabidopsis thaliana* root, for  
65 instance, Muraro et al. (2013, 2014) and el-Showk et al. (2015) developed models of vascular  
66 patterning based on a finding by Bishopp et al. (2011) that a crosstalk between auxin and cytokinin  
67 specifies developmental zones. To reproduce maize leaf growth profiles, De Vos et al. (2020)  
68 integrated hormonal crosstalk into a model and predicted the existence of a signal produced in the

69 mature part of the leaf. Such approaches will be instrumental in understanding xylogenesis, with the  
70 additional challenge that not only growth profiles and developmental zonation have to be explained,  
71 but also the cell size pattern typical of tree rings.

72 To investigate the potential of the crosstalk between two biochemical signals in controlling tree  
73 radial growth, wood formation, and tree-ring structure, we further developed the XyDyS modelling  
74 framework. XyDyS2 assigns xylem cell identity based on two interacting biochemical signals.

## 75 Material and Methods

### 76 Model description

#### 77 *Core of the XyDyS2 model*

78 Taking advantage of the symmetry of the xylem tissue, we only consider a single radial file of  
79 differentiating cells (Fig. 1). The radial file is composed of cells that either differentiate into  
80 tracheids within a given growing season (possibly after one or several division cycles) or remain  
81 undifferentiated in the cambium at the end of the season. We focus on a single growing season and  
82 the formation of one tree ring. Spatially, the first boundary of the system (“the cambium boundary”)  
83 is the interface with the part of the cambium which differentiates into phloem. The second boundary  
84 (“the xylem boundary”) is the interface with the mature xylem produced during the previous year.  
85 Within a file, cells are indexed from  $i = 1$ , at the cambium boundary, to  $i = N(t)$ , at the xylem  
86 boundary,  $N(t)$  being the number of cells in the radial file at time  $t$ . Each cell is geometrically  
87 characterised by its radial dimension, called “length”  $L_i(t)$ .  $L(t)$  denotes the total length of the radial  
88 file at time  $t$ . For the initial condition, we suppose that there are initially  $N_0$  cambial cells in the  
89 radial file, all with the same length  $L_{\text{init}}$ .

90 Two signals, denoted by D and G, flow through the radial file, coming from the cambium boundary:  
91 Signal D is associated with cell division and could be identified as either the TDIF peptide or the  
92 cytokinin phytohormone, Signal G is associated with cell growth and is identified as auxin.

#### 93 *Apoplastic diffusion of signal D*

94 The exact nature of the signal D is not elucidated, but we assume that it diffuses in the apoplast, like  
95 peptides and cytokinins do (Robert and Friml, 2009). The simplest model for signal diffusion is  
96 Fick’s law (Crick, 1970), with a constant decay rate. We also assume that signal D is not produced  
97 in the developing tissue but comes from an external source at the cambium boundary. This “source-  
98 diffusion-decay mechanism” is similar to that proposed by Wartlick et al. (2009) and Grieneisen et  
99 al. (2012) for root primary growth. Given the very slow growth of the developing xylem, dilution

100 and advection (i.e. directed movement driven by tissue growth) can be neglected (Hartmann et al.  
101 2017). Then, the transport equation of signal D writes as:

$$\frac{\partial D(x, t)}{\partial t} = \underbrace{\delta_D \frac{\partial^2 D(x, t)}{\partial x^2}}_{diffusion} - \underbrace{\mu_D D(x, t)}_{decay}. \quad (1)$$

102  $D(x, t)$  denotes the concentration of signal D at position  $x$  and time  $t$ ,  $\delta_D$  denotes its diffusion  
103 coefficient and  $\mu_D$  its decay rate. The space variable  $x$  is defined such that the cambium boundary of  
104 the file is located at  $x = 0$  and the xylem boundary at  $x = L(t)$ .

105 Equation 1 can be solved analytically. It is useful to introduce a characteristic length associated with  
106 the diffusion-decay process, expressed as:

$$\lambda = \sqrt{\frac{\delta_D}{\mu_D}}. \quad (2)$$

107 When the file becomes long compared to  $\lambda$ , the concentration profile reaches a stationary  
108 exponential shape, given by the equation:

$$D(x) = D(0) \exp\left(\frac{-x}{\lambda}\right). \quad (3)$$

109 Finally,  $D_i$  denotes the average concentration of signal  $D$  in cell  $i$ .

110 *Symplastic polar transport of signal G*

111 To describe the flow of signal G, identified as auxin (Perrot-Rechenmann 2010), we use a model of  
112 auxin fluxes similar to the “unidirectional transport mechanism” from Grieneisen et al. (2012) and  
113 Hartmann et al. (2017). Where PIN carrier proteins are present, auxin is polarly transported from  
114 one cell to another. In addition to this active transport, there is a residual constitutive permeability  
115 to auxin, which is the same between every consecutive cell. The auxin flux  $F_{i,i+1}$  from cell  $i$  to cell  
116  $i+1$  depends on the concentration of auxin in cell  $i$  and on the amount of PIN in cell  $i$  oriented  
117 toward cell  $i+1$  (Grieneisen et al. 2012). This writes as:

$$F_{i,i+1}(t) = (p_{i,i+1}(t) + q)G_i(t). \quad (4)$$

118  $G_i(t)$  is the concentration of signal G in cell  $i$ ,  $p_{i,i+1}$  is the amount of PIN proteins in cell  $i$  oriented  
 119 toward cell  $i+1$ , and  $q$  is the constitutive permeability to auxin. Moreover, we assume that PIN  
 120 proteins are always oriented toward the xylem, i.e.  $p_{i,i-1} = 0$ . Therefore, auxin fluxes toward the  
 121 cambium boundary rely only on constitutive permeability, i.e.  $F_{i,i-1}(t) = qG_i(t)$ .

122 If one considers cell  $i$ , entering fluxes from cells  $i-1$  and  $i+1$  are respectively  $F_{i-1,i}$  and  $F_{i+1,i}$ , and  
 123 exiting fluxes toward cells  $i-1$  and  $i+1$  are respectively  $F_{i,i-1}$  and  $F_{i,i+1}$ . Considering also decay, and  
 124 dilution due to cell growth, the concentration of signal G in cell  $i$  is governed by the following  
 125 equation:

$$\frac{dG_i}{dt} = \frac{1}{L_i} \left( \underbrace{F_{i-1,i} + F_{i+1,i}}_{\text{entering fluxes}} - \underbrace{F_{i,i-1} - F_{i,i+1}}_{\text{exit ing fluxes}} \right) - \underbrace{\mu_G G_i}_{\text{decay}} - \underbrace{\dot{\epsilon}_i G_i}_{\text{dilution}} \quad (5)$$

126  $\mu_G$  is the decay rate of signal G, and  $\dot{\epsilon}_i$  is the growth rate of cell  $i$  (Mouliia and Fournier 2009),  
 127 defined by:

$$\dot{\epsilon}_i(t) = \frac{1}{L_i(t)} \frac{dL_i(t)}{dt}. \quad (6)$$

128 If fluxes are decomposed into polar and passive components, equation 5 becomes:

$$\frac{dG_i}{dt} = \frac{1}{L_i} \left( (p_{i-1,i} + q)G_{i-1} - (p_{i,i+1} + 2q)G_i + qG_{i+1} \right) - \mu_G G_i - \dot{\epsilon}_i G_i. \quad (7)$$

### 129 *Cell identity assignment*

130 In the classical morphogenetic-gradient model (Bhalerao and Fischer 2014; Hartmann et al. 2017),  
 131 cell identities are set by a single signal, with two concentration threshold values: a division  
 132 threshold  $T_{div}$ , and an enlargement threshold  $T_{ent}$ , with  $T_{div} > T_{ent}$ . But this way of assigning  
 133 identities leads to unrealistic patterns in mature tracheid diameters (Hartmann et al. 2017). Here,  
 134 two distinct signals assign cell identities (Fig. 1). Where the concentration of signal D is higher than  
 135 the division threshold  $T_{div}$ , cells are able to divide. Similarly, where the concentration of signal G is  
 136 higher than the enlargement threshold  $T_{ent}$ , cells enlarge. More formally, for a given cell:

- 137
- if  $D_i \geq T_{div}$ , the cell is able to enlarge and divide;
- 138
- if  $D_i < T_{div}$  and  $G_i \geq T_{ent}$ , the cell is not able to divide anymore, but it can keep enlarging;

139 • if  $G_i < T_{ent}$ , the cell no longer enlarges.

140 Moreover, we assume that auxin efflux carriers (PIN proteins) are present only in cells that are able  
141 to divide (i.e.  $p_{i,i+1} > 0$  only if  $D_i \geq T_{div}$ ). In these cells, the amount of PIN proteins,  $p_{i,i+1}$ , is  
142 assumed to be proportional to the auxin concentration (signal  $G$ ) in cell  $i$ :

$$p_{i,i+1}(t) = k_p G_i(t). \quad (8)$$

### 143 *Cell growth and division*

144 Although the mechanical force for cell enlargement comes from turgor pressure, this process is  
145 controlled by cell wall extensibility (Cosgrove, 2005). We assume that auxin acts on wall  
146 extensibility (Arsuffi and Braybrook 2018), and thus controls the growth rate of those cells which  
147 have an identity that allows them to enlarge. The simplest relationship is a direct proportionality:  
148  $\dot{\epsilon}_i(t) = k_g G_i(t)$ , where  $k_g$  is a proportionality constant (Hartmann et al. 2017). However, this  
149 relationship implies exponential growth for constant levels of auxin, which tends to amplify  
150 inhomogeneities in cell sizes. Therefore, we propose here that larger cells display a weaker growth  
151 response to auxin, in the form of an inverse proportionality to cell size:

$$\dot{\epsilon}_i(t) = k_g \frac{L_{init}}{L_i(t)} G_i(t). \quad (9)$$

152 Cell division follows a simple geometrical criterion: if a cell has an identity that allows division, it  
153 divides when reaching a critical length defined as twice its initial length  $L_{init}$  (Hartmann et al. 2017).

154 All parameters of the model are listed in Table 1.

### 155 *Definition of developing zones*

156 Experimentally, the descriptions of the developmental zones are based on visual criteria. In order to  
157 be able to compare the outputs of the XyDyS2 model with real data, we apply similar criteria *a*  
158 *posteriori* on model outputs, setting “apparent statuses” to virtual cells:

- 159 • Cambial cells are growing cells that are smaller than two times the diameter of a newly  
160 created cell ( $L_i < 2L_{init}$ ).
- 161 • Enlarging cells are growing cells that are larger than two times the diameter of a newly  
162 created cell ( $L_i > 2L_{init}$ ).
- 163 • Wall-thickening and mature cells are no longer growing cells (Fig. 1).

### 164 *Boundary conditions*



165 The concentrations of signals D and G are imposed at the cambium boundary of the file, and are  
166 given as entries of the simulations (Fig. 2). The concentration of signal D at the cambium boundary  
167 is assumed to increase rapidly at the beginning of the season, and then decreases slowly. The  
168 cambium-boundary concentration of signal G is assumed to peak during the first weeks of the  
169 season, then progressively decrease to zero as the season goes. This reflects the sudden flush of  
170 auxin coming from the shoots during bud break. Finally, we assume that the xylem acts as an  
171 impermeable barrier to molecules of signals D and G. Accordingly, a zero-flux boundary condition  
172 is imposed for both signals at the xylem boundary.

### 173 *Implementation and visualization of the simulations*

174 Transport equations are numerically solved using an explicit Euler method. For signal D, which  
175 diffuses in the apoplast, additional discretisation nodes are regularly inserted in growing cells so  
176 that the Courant–Friedrichs–Lewy stability condition is always satisfied. We have developed a  
177 dedicated graphical user interface. The source code, written in Python, is freely available online  
178 (<https://forgemia.inra.fr/felix.hartmann/xydys>). Simulation outputs are visualized using the  
179 graphical convention explained in Fig. 1.

## 180 **Results**

181 The cross-talk between the two signals leads to the progressive establishment of a  
182 stable auxin gradient

183 We first looked at the establishment of signal concentration profiles at the beginning of the growing  
184 season. Since the length of the cell file was initially shorter than the characteristic length  $\lambda$ , signal D  
185 was filling in the cell file, with a high concentration everywhere (Fig. 3a and S1 Video). Therefore,  
186 all cells were dividing and transported auxin toward the xylem. As a consequence, signal G initially  
187 accumulated in the cells close to the xylem boundary, which thus had high growth rates. As the cell  
188 file became larger than  $\lambda$ , the concentration profile of signal D progressively reached the stationary  
189 exponential shape given by Eq. 3. From this time on, polar transport was limited to a few dividing  
190 cells and the concentration of signal G peaked around the boundary between the cambial and  
191 enlarging zones (Fig. 3b). The gradient of signal G was then stable and the height of the peak  
192 depended only on signal G concentration at the cambium boundary. Near the end of the growing  
193 season, the signal G became too low for a peak to form (Fig. 3c). This shows that active polar  
194 transport, regulated by another signal, can account for the peaked distribution of auxin observed  
195 experimentally in the developing xylem (Uggla et al. 2001).

196 The cross-talk between the two signals controls the developmental zonation over the

197 growing season

198 The width of the cambial zone was controlled mostly by signal D. At the beginning of the growing  
199 season, all cells belong to the cambium and the cambial zone expanded rapidly since signal D was  
200 high in every cell. This caused an early ‘burst’ in the number of cambial cells and, after a lag, in the  
201 number of enlarging cells. Such a rapid increase had also been observed in real wood formation  
202 monitoring studies (Cuny et al. 2014, 2018; Balducci et al. 2016). As the concentration profile of  
203 signal D stabilised into a stationary gradient, the number of cambial cells reached a constant value.  
204 This value depended only on the concentration of signal D imposed at the cambium boundary and  
205 on the characteristic length,  $\lambda$ . Since  $\lambda$  was assumed to be constant (because the diffusion coefficient  
206 and decay rate of signal D are themselves constant), the width of the cambial zone was entirely  
207 driven by the concentration of signal D at the cambium boundary.

208 Regarding the enlargement zone, the width of the gradient of signal G was the main driver. For a  
209 given value of decay rate, this width increased with the height of the concentration peak, which in  
210 turn depended on the concentration of signal G at the cambium boundary and on the number of  
211 polar transporters in dividing cells. Since the number of transporters was assumed to be  
212 proportional to the local concentration of signal G, the width of the enlargement zone was entirely  
213 driven by the concentration of signal G imposed at the cambium boundary.

214 The patterns of variations that we imposed on the concentrations of signals D and G at the cambium  
215 boundary, as described above, lead to the variations in cell numbers in the cambial and enlargement  
216 zones represented in Fig. 4a. Comparison with experimental data from Cuny et al. (2014) displays  
217 good agreement across the growing season (Fig. 4b). This supports that developmental zonation can  
218 be adequately controlled by the cross-talk between two biochemical signals.

219 The cross-talk between signal D and G engenders a realistic pattern of stem radial  
220 growth

221 The total growth rate of the cell file was directly related to the total quantity of signal G in the  
222 tissue. Three factors determined this quantity: 1) The concentration of signal G imposed at the  
223 cambium boundary; 2) the number of cells contributing to the polar transport of signal G (i.e. the  
224 number of dividing cells), controlled by the gradient of signal D; and 3) the amount of polar  
225 transporters in each of these cells ( $p_{i,i+1}$ ), which was itself directly proportional to the local  
226 concentration of signal G. As a consequence, the global growth rate of the cell file was controlled  
227 by the concentration of signal G at the cambium boundary and, to a lesser extent, by the boundary  
228 concentration of signal D.

229 With our hypotheses for the changes in the concentrations of signals D and G at the cambium  
230 boundary, the simulation resulted in the cumulative growth curve shown in Fig. 5a. It can be  
231 compared with measurements made on Scots pine (*Pinus sylvestris*) by Michelot et al. (2012), and  
232 displayed in Fig. 5b. In our simulations, we did not try to match the final cumulative growth, which  
233 depends on many factors, so only general shape of the curves should be compared. Although the  
234 agreement is not perfect, the simulated curve reproduces qualitatively the slow start, the progressive  
235 acceleration, the stable linear part, and the final progressive cessation of growth.

## 236 The cross-talk between signal D and G engenders a realistic tree-ring structure

237 We found that the final size of each tracheid was proportional to the height of the concentration  
238 peak of signal G at the time the cell lost its ability to divide. Indeed, the higher the peak is when the  
239 cell moves to the enlargement phase, the more signal G is available to the cell for this phase. The  
240 height of the peak depends in turn on the concentration of signal G on the cambium boundary and  
241 on the magnitude of active polar transport. The strong supply of signal G at the beginning of the  
242 growing season resulted in large earlywood cells. The progressive decrease in auxin supply during  
243 the progression of the growing season led to transition wood and, finally, narrow latewood cells  
244 (Fig. 6a).

245 The previous implementation of the morphogenetic-gradient hypothesis in a dynamical model  
246 predicted unrealistic regular spatial oscillations of high amplitudes in final cell sizes (Hartmann et  
247 al. 2017). Here, the size-dependence between auxin concentration and growth rates introduced in  
248 Eq. 9 greatly alleviated this problem. This hypothesis did not produce smooth variations in cell  
249 sizes along a tracheidogram, but rather moderate-amplitude irregularities that can also be found in  
250 experimental data (Fig. 6b).

## 251 Discussion

252 In a previous work (Hartmann et al. 2017), we have shown that the morphogenetic-gradient  
253 hypothesis was not compatible with the anatomical structure of conifer tree rings. In the present  
254 article, we proposed a new model involving two biochemical signals. The first signal is associated  
255 with cell division and could be identified as the peptide TDIF, which is known to enter the cambium  
256 from the phloem and to be involved in vascular stem cell maintenance (Hirakawa et al. 2008;  
257 Etchells et al. 2015). Another candidate for this first signal is the plant hormone cytokinin, whose  
258 regulatory effect on cambial activity has been reported in aspen (Nieminen et al. 2008). The second  
259 signal is associated with cell growth and identified as auxin. Indeed, auxin is known to stimulate  
260 cell growth in many tissues, including stems (Perrot-Rechenmann 2010), and to inhibit secondary  
261 cell wall deposition (Johnsson et al. 2018).

262 Our model reproduced the main features of intra-annual dynamics of conifer wood formation over a  
263 growing season, i.e. the shape of the radial growth curve, the temporal evolution of differentiation  
264 zones, and the final anatomical structure of the tree ring in terms of tracheid radial diameters. It also  
265 provided an explanation for the pattern of auxin distribution in the developing xylem. The final  
266 radial size of cells was controlled by the supply of auxin to the cambium. Such a control was not  
267 possible with the classical morphogenetic-gradient hypothesis. It became possible by introducing  
268 two new hypotheses in XyDyS2: a decoupling of cell growth from division through the introduction  
269 of a second signal, plus a feedback of auxin on its own transport. With these new hypotheses, the  
270 final radial diameter of a tracheid was essentially set by its auxin content at the time it exits the  
271 cambial zone. This result supports the idea of hierarchical control proposed by Vaganov et al.  
272 (2011).

273 Our assumption that auxin polar lateral transport plays a significant role in wood formation is based  
274 on an experimental study on aspen by Schrader et al. (2003). In particular, they observed higher  
275 expression of PIN genes in dividing xylem cells than in expanding ones. This is why we assumed  
276 that PIN proteins responsible for lateral auxin transport are only present in dividing cells. However,  
277 there is no spatially-resolved direct measurement of the concentration and localisation of PINs in  
278 the cambium. Our hypothesis that PINs are polarised towards the xylem hence remains speculative.  
279 Another crucial hypothesis of our model is the auxin-dependence of PIN synthesis. Such auxin-  
280 dependence of PIN synthesis is strongly supported by experiments on apical meristems (Vieten et  
281 al. 2005), but so far there is no direct evidence of it in the cambium. Further experimental works are  
282 thus needed to get a better understanding of polar auxin transport in the developing xylem and  
283 assess our hypotheses.

284 In our previous modelling work, we reported large oscillations of final cell sizes along a simulated  
285 tree-ring (Hartmann et al. 2017). We showed here that these oscillations can be strongly attenuated  
286 by assuming that the growth response of cells is size-dependent. This is based on the biological idea  
287 that larger cells have a lower density of DNA in their cytoplasm (provided there is no  
288 endoreplication), and thus have a lower capacity to sustain growth. This hypothesis is supported by  
289 the works of Mellerowicz and Riding (1992) who did not find any endoreplication in *Abies*  
290 *balsamea* cambium. Further support for weaker growth response in larger cells comes from  
291 observations in sepal epidermis, where smaller cell lineages grow faster than larger ones (Tsugawa  
292 et al. 2017). This results in a homogenization of cell sizes. Moreover, in the shoot apical meristem  
293 of *Arabidopsis thaliana*, Willis et al. (2016) found that, after an asymmetrical division, the smallest  
294 daughter cell grows at faster rate than the largest one.

295 Although attenuated, fluctuations in final cell sizes were still present in our simulations. They were,  
296 however, similar in amplitude to fluctuations observed in actual tracheidograms. It is interesting to  
297 note that these oscillations are completely determined by the mechanisms behind the growth  
298 dynamics of the developing xylem tissue, without any explicit stochastic component. Numerous  
299 cellular processes involve stochastic component (Meroz and Bastien 2014; Meyer et al. 2017), and  
300 this aspect should be also investigated in the future. Nevertheless, our results underline that not all  
301 heterogeneities in cell features are attributable to stochastic processes.

302 We used a purely deterministic criterion for division, based on a cell size threshold. This  
303 assumption is supported by the probable existence of a cell size checkpoint at the G1-S transition  
304 (Schiessl et al. 2012). Moreover, analyses of cell size distribution along the growth zone of  
305 developing roots (Beemster and Baskin 1998) and leaves (Fiorani et al. 2000) suggest that all the  
306 cells in a given meristem divide in half at the same length. However, the critical-size criterion is  
307 likely to be essentially a first-order approximation. In the shoot apical meristem, Willis et al. (2016)  
308 found that it could not fully account for the cell-cycle statistics observed. Future modelling works  
309 could explore whether introducing stochasticity here can better reproduce wood anatomical  
310 structure.

311 We focused on biochemical signals to model wood formation, with no explicit mention of  
312 environmental factors. In reality, the inputs of our model, i.e. the supplies of signals into the  
313 cambium, are related to developmental and environmental conditions. These relationships are not  
314 known exactly, and tree-scale models are needed to connect signal sources to sinks. Moreover,  
315 temperature and water status also alter the capacity of cells to respond to signals. Here we made the  
316 implicit hypothesis that environmental conditions were not limiting. Further developments of our  
317 model could consider how wood formation dynamics is affected by water stress, which can be a  
318 limiting factor at least in the xeric area (Cabon et al. 2020a). Ignoring temperature effects also limits  
319 the scope of our model. For instance, we do not model the timing of the onset of cambial activity,  
320 which is likely to be triggered by temperature (Begum et al. 2012; Delpierre et al. 2019; Cabon et  
321 al. 2020b). Similarly, growth cessation in autumn may involve responses to day length (Baba et al.  
322 2011), temperature (Begum et al. 2016), or even drought (Ziaco et al. 2016, Cabon et al. 2020b).  
323 Finally, wind-induced mechanical strains have been proved a major driver of wood growth rate  
324 (Bonnesoeur et al. 2016) and of wood anatomy (Roignant et al. 2018).

325 The final phases of xylem cell differentiation, i.e. secondary wall formation and programmed cell  
326 death, involve many biochemical processes. However, they may not be controlled by an additional  
327 signal. It has been observed that the amount of secondary wall material is about the same in each  
328 mature xylem cell along a tree ring, except for the very last latewood cells (Cuny et al. 2014). This

329 observation could be used to deduce secondary wall thickness from cell size. Besides, temperature  
330 seems to play little role in wall thickness, since forming tracheids compensate a decreased rate of  
331 differentiation by an extended duration, except for the last cells of the latewood (Cuny et al. 2018).  
332 Here we considered that the spatial organisation of the cambium relies only on biochemical signals.  
333 However, it is possible that the mechanical pressure exerted by the bark is also involved in cambial  
334 organisation, by setting a radial polarity field (Yeoman and Brown 1971). Mechanical signals are  
335 known to be essential in the dynamics of the shoot apical meristem, especially in the boundary  
336 region, where cells divide periclinally (Louveaux et al. 2016) just as in the cambium. While  
337 biochemical signals are likely to play a major role in controlling cell differentiation, division, and  
338 growth rate during the growing season, mechanics probably also provides cues to cambial cells.  
339 Future, more advanced models of cambial activity and wood formation should embrace both  
340 biochemical, environmental and mechanical signalling.

## 341 **Supplementary Data**

342 **S1 Video *Video of the simulation.***

## 343 **Acknowledgment**

344 FPH thanks Mélanie Decourteix for helpful discussions.

## References

- Arsuffi G, Braybrook SA. 2018. Acid growth: an ongoing trip. *Journal of Experimental Botany* 69, 137-146.
- Baba K, Karlberg A, Schmidt J, Schrader J, Hvidsten TR, Bako L, Bhalerao RP. 2011. Activity-dormancy transition in the cambial meristem involves stage-specific modulation of auxin response in hybrid aspen. *Proceedings of the National Academy of Sciences, USA* 108, 3418–23.
- Baker RE, Maini PK. 2007. A mechanism for morphogen-controlled domain growth. *Journal of Mathematical Biology* 54, 597–622.
- Balducci L, Cuny HE, Rathgeber CBK, Deslauriers A, Giovannelli A, Rossi S. 2016. Compensatory mechanisms mitigate the effect of warming and drought on wood formation. *Plant, Cell & Environment* 39, 1338–1352. PCE-15-0756.
- Barnett JR. 1978. Fine structure of parenchymatous and differentiated pinus radiata callus. *Annals of Botany* 42, 367–373.
- Beemster GT, Baskin TI. 1998. Analysis of cell division and elongation underlying the developmental acceleration of root growth in arabidopsis thaliana. *Plant Physiology* 116, 1515–1526.
- Begum S, Kudo K, Matsuoka Y, et al.. 2016. Localized cooling of stems induces latewood formation and cambial dormancy during seasons of active cambium in conifers. *Annals of Botany* 117, 465–477.
- Begum S, Nakaba S, Yamagishi Y, Yamane K, Islam MA, Oribe Y, Ko JH, Jin HO, Funada R. 2012. A rapid decrease in temperature induces latewood formation in artificially reactivated cambium of conifer stems. *Annals of Botany* 110, 875–885.
- Bennett T, Hines G, Leyser O. 2014. Canalization: what the flux? *Trends in Genetics* 30, 41–48.
- Bhalerao RP, Bennett MJ. 2003. The case for morphogens in plants. *Nature Cell Biology* 5, 939–43.
- Bhalerao RP, Fischer U. 2014. Auxin gradients across wood – instructive or incidental? *Physiologia Plantarum* 151, 43–51.
- Bhalerao RP, Fischer U. 2017. Environmental and hormonal control of cambial stem cell dynamics. *Journal of Experimental Botany* 68, 79–87.
- Bishopp A, Help H, El-Showk S, Weijers D, Scheres B, Friml J, Benková E, Mañhoñen AP, Helariutta Y. 2011. A mutually inhibitory interaction between auxin and cytokinin specifies vascular pattern in roots. *Current Biology* 21, 917–926.



Bonnesoeur V, Constant T, Moulia B, Fournier M. 2016. Forest trees filter chronic wind-signals to acclimate to high winds. *New Phytologist* 210, 850-860.

Brackmann K, Qi J, Gebert M, et al. 2018. Spatial specificity of auxin responses coordinates wood formation. *Nature communications* 9, 875.

Brown CL, Sax K. 1962. The influence of pressure on the differentiation of secondary tissues. *American Journal of Botany* 49, 683–691.

Buttò V, Deslauriers A, Rossi S, Rozenberg P, Shishov V, Morin H. 2020. The role of plant hormones in tree-ring formation. *Trees* 34, 315–335.

Cabon A, Peters RL, Fonti P, Martínez-Vilalta J, De Cáceres M. 2020b. Temperature and water potential co-limit stem cambial activity along a steep elevational gradient. *New Phytologist*, <http://doi.org/10.1111/nph.16456>

Cabon A, Fernández-de Uña L, Gea-Izquierdo G, Meinzer FC, Woodruff DR, Martínez-Vilalta J, De Cáceres M. 2020a. Water potential control of turgor-driven tracheid enlargement in scots pine at its xeric distribution edge. *New Phytologist* 225, 209-221.

Camarero JJ, Guerrero-Campo J, Gutiérrez E. 1998. Tree-ring growth and structure of *Pinus uncinata* and *Pinus sylvestris* in the central Spanish Pyrenees. *Arctic and Alpine Research* 30, 1–10.

Carteni F, Deslauriers A, Rossi S, Morin H, De Micco V, Mazzoleni S, Giannino F. 2018. The physiological mechanisms behind the earlywood-to-latewood transition: A process-based modeling approach. *Frontiers in Plant Science* 9. <https://doi.org/10.3389/fpls.2018.01053>

Cosgrove DJ. 2005. Growth of the plant cell wall. *Nature Reviews. Molecular Cell Biology* 6, 850–861.

Crampin EJ, Gaffney EA, Maini PK. 2002. Mode-doubling and tripling in reaction-diffusion patterns on growing domains: A piecewise linear model. *Journal of Mathematical Biology* 44, 107–128.

Cuny HE, Fonti P, Rathgeber CB, von Arx G, Peters RL, Frank D. 2018. Couplings in cell differentiation kinetics mitigate air temperature influence on conifer wood anatomy. *Plant, Cell & Environment* 42, 1222-1232.

Cuny HE, Rathgeber CBK, Frank D, et al. 2015. Woody biomass production lags stem-girth increase by over one month in coniferous forests. *Nature Plants* 1, 15160.



- Cuny HE, Rathgeber CBK, Frank D, Fonti P, Fournier M. 2014. Kinetics of tracheid development explain conifer tree-ring structure. *New Phytologist* 203, 1231–1241.
- Cuny HE, Rathgeber CBK, Kiessé TS, Hartmann FP, Barbeito I, Fournier M. 2013. Generalized additive models reveal the intrinsic complexity of wood formation dynamics. *Journal of Experimental Botany* 64, 1983–1994.
- Cuny HE, Rathgeber CBK, Lebourgeois F, Fortin M, Fournier M. 2012. Life strategies in intra-annual dynamics of wood formation: example of three conifer species in a temperate forest in north-east France. *Tree Physiology* 32, 612–625.
- Deleuze C, Houllier F. 1998. A simple process-based xylem growth model for describing wood microdensitometric profiles. *Journal of Theoretical Biology* 193, 99–113.
- Delpierre N, Lireux S, Hartig F, et al. 2019. Chilling and forcing temperatures interact to predict the onset of wood formation in northern hemisphere conifers. *Global Change Biology* 25, 1089–1105.
- De Vos D, Nelissen H, AbdElgawad H, Prinsen E, Broeckhove J, Inzé D, Beemster GTS. 2020. How grass keeps growing: an integrated analysis of hormonal crosstalk in the maize leaf growth zone. *New Phytologist* 225, 2513-2525.
- Drew DM, Downes G. 2015. A model of stem growth and wood formation in *Pinus radiata*. *Trees* 29, 1395–1413.
- el-Showk S, Help-Rinta-Rahko H, Blomster T, Siligato R, Marée AFM, Mähönen AP, Grieneisen V. 2015. Parsimonious Model of Vascular Patterning Links Transverse Hormone Fluxes to Lateral Root Initiation: Auxin Leads the Way, while Cytokinin Levels Out. *PLoS Computational Biology* 11, <http://doi.org/10.1371/journal.pcbi.1004450>
- Etchells JP, Mishra LS, Kumar M, Campbell L, Turner SR. 2015. Wood formation in trees is increased by manipulating PXY-regulated cell division. *Current Biology* 25, 1050–1055.
- Fiorani F, Beemster GT, Bultynck L, Lambers H. 2000. Can meristematic activity determine variation in leaf size and elongation rate among four poa species? a kinematic study. *Plant Physiology* 124, 845–856.
- Grieneisen VA, Scheres B, Hogeweg P, Marée AFM. 2012. Morphogengineering roots: comparing mechanisms of morphogen gradient formation. *BMC System Biology* 6, 37.
- Gursansky NR, Jouannet V, Grünwald K, Sanchez P, Laaber-Schwarz M, Greb T. 2016. Moll is required for cambium homeostasis in Arabidopsis. *The Plant Journal* 86, 210-220.

Han S, Cho H, Noh J, Qi J, Jung HJ, Nam H, Lee S, Hwang D, Greb T, Hwang I. 2018. BIL1-mediated MP phosphorylation integrates PXY and cytokinin signalling in secondary growth. *Nature Plants* 4, 605.

Hartmann FP, Rathgeber CBK, Fournier M, Moulia B. 2017. Modelling wood formation and structure: power and limits of a morphogenetic gradient in controlling xylem cell proliferation and growth. *Annals of Forest Science* 74, 14.

Hirakawa Y, Shinohara H, Kondo Y, Inoue A, Nakanomyo I, Ogawa M, Sawa S, Ohashi-Ito K, Matsubayashi Y, Fukuda H. 2008. Non-cell-autonomous control of vascular stem cell fate by a CLE peptide/receptor system. *Proceedings of the National Academy of Sciences, USA* 105, 15208–15213.

Hoikka T, Mäkinen H, Nojd P, Mäkelä A, Nikinmaa E. 2010. A physiological model of softwood cambial growth. *Tree Physiol* 30, 1235–1252.

Immanen J, Nieminen K, Smolander OP, et al. 2016. Cytokinin and auxin display distinct but interconnected distribution and signaling profiles to stimulate cambial activity. *Current Biology* 26, 1990–1997.

Johnsson C, Jin X, Xue W, Dubreuil C, Lezhneva L, Fischer U. 2018. The plant hormone auxin directs timing of xylem development by inhibition of secondary cell wall deposition through repression of secondary wall NAC-domain transcription factors. *Physiologia Plantarum* 165, 673–689.

Kiorapostolou N, Galiano-Pérez L, von Arx G, Gessler A, Petit G. 2018. Structural and anatomical responses of *Pinus sylvestris* and *Tilia platyphyllos* seedlings exposed to water shortage. *Trees* 32, 1211–1218.

Li Z, Cui K. 1988. Differentiation of secondary xylem after girdling. *IAWA Journal* 9, 375–383.

Louveaux M, Julien J-D, Mirabet V, Boudaoud A, Hamant O. 2016. Cell division plane orientation based on tensile stress in *Arabidopsis thaliana*. *Proceedings of the National Academy of Sciences, USA* 113, 4294–4303.

Meroz Y, Bastien R. 2014. Stochastic processes in gravitropism. *Frontiers in Plant Science* 5, 674. <http://doi.org/10.3389/fpls.2014.00674>

Meyer HM, Teles J, Formosa-Jordan P, Refahi Y, San-Bento R, Ingram G, Johnsson H, Locke JCW, Roeder AH. 2017. Fluctuations of the transcription factor *atml1* generate the pattern of giant cells in the *Arabidopsis* sepal. *eLife* 6, <https://doi.org/10.7554/eLife.19131>

Michelot A, Simard S, Rathgeber CBK, Dufrene E, Damesin C. 2012. Comparing the intra-annual wood formation of three European species (*Fagus sylvatica*, *Quercus petraea* and *Pinus sylvestris*) as related to leaf phenology and non-structural carbohydrate dynamics. *Tree Physiology* 32, 1033–1045.

Mouliat B, Fournier M. 2009. The power and control of gravitropic movements in plants: a biomechanical and systems biology view. *Journal of Experimental Botany* 60, 461–486.

Muraro D, Byrne H, King JR, Bennett M. 2013. The role of auxin and cytokinin signalling in specifying the root architecture of *Arabidopsis thaliana*. *Journal of Theoretical Biology* 317, 71–86.

Muraro D, Mellor N, Pound MP, et al. 2014. Integration of hormonal signaling networks and mobile microRNAs is required for vascular patterning in *Arabidopsis* roots. *Proceedings of the National Academy of Sciences, USA* 111, 857–62.

Nieminen K, Immanen J, Laxell M, et al. 2008. Cytokinin signaling regulates cambial development in poplar. *Proceedings of the National Academy of Sciences, USA* 105, 20032–7.

Perrot-Rechenmann C. 2010. Cellular responses to auxin: Division versus expansion. *Cold Spring Harbor Perspectives in Biology* 2.

Ragni L, Greb T. 2018. Secondary growth as a determinant of plant shape and form. *Seminars in Cell & Developmental Biology* 79, 58–67.

Rathgeber CB, Cuny HE, Fonti P. 2016. Biological basis of tree-ring formation: a crash course. *Frontiers in Plant Science* 7, 734. <http://doi.org/10.3389/fpls.2016.00734>

Robert HS, Friml J. 2009. Auxin and other signals on the move in plants. *Nature Chemical Biology* 5, 325–32.

Roignant J, Badel É, Leblanc-Fournier N, Brunel-Michac N, Ruelle J, Mouliat B, Decourteix M. 2018. Feeling stretched or compressed? The multiple mechanosensitive responses of wood formation to bending. *Annals of Botany* 121, 1151–1161.

Rossi S, Deslauriers A, Morin H. 2003. Application of the Gompertz equation for the study of xylem cell development. *Dendrochronologia* 21, 33–39.

Schiessl K, Kausika S, Southam P, Bush M, Sablowski R. 2012. Jagged controls growth anisotropy and coordination between cell size and cell cycle during plant organogenesis. *Current Biology* 22, 1739–1746.

Schiestl-Aalto P, Kulmala L, Mäkinen H, Nikinmaa E, Mäkelä A. 2015. Cassia – a dynamic model for predicting intra-annual sink demand and interannual growth variation in Scots pine. *New Phytologist* 206, 647–659.

Schrader J, Baba K, May ST, Palme K, Bennett M, Bhalerao RP, Sandberg G. 2003. Polar auxin transport in the wood-forming tissues of hybrid aspen is under simultaneous control of developmental and environmental signals. *Proceedings of the National Academy of Sciences, USA* 100, 10096–101.

Smetana O, Mäkelä R, Lyu M, et al. 2019. High levels of auxin signalling define the stem-cell organizer of the vascular cambium. *Nature* 565, 485–489.

Sundberg B, Uggla C, Tuominen H. 2000. Cambial growth and auxin gradients. In: Savidge R, Barnett J, Napier R, eds., *Cell and Molecular Biology of Wood Formation*, BIOS Scientific Publishers, 169 – 188.

Tsugawa S, Hervieux N, Kierzkowski D, Routier-Kierzkowska AL, Sapala A, Hamant O, Smith RS, Roeder AHK, Boudaoud A, Li CB. 2017. Clones of cells switch from reduction to enhancement of size variability in *Arabidopsis* sepals. *Development* 144, 4398–4405.

Tuominen H, Puech L, Fink S, Sundberg B. 1997. A radial concentration gradient of indole-3-acetic acid is related to secondary xylem development in hybrid aspen. *Plant Physiology* 115, 577–585.

Uggla C, Magel E, Moritz T, Sundberg B. 2001. Function and dynamics of auxin and carbohydrates during early-wood/latewood transition in Scots pine. *Plant Physiology* 125, 2029–2039.

Uggla C, Mellerowicz EJ, Sundberg B. 1998. Indole-3-acetic acid controls cambial growth in Scots pine by positional signaling. *Plant Physiology* 117, 113–121.

Uggla C, Moritz T, Sandberg G, Sundberg B. 1996. Auxin as a positional signal in pattern formation in plants. *Proceedings of the National Academy of Sciences, USA* 93, 9282–9286.

Vaganov EA, Hughes MK, Shashkin AV. 2006. Growth dynamics of conifer tree rings: images of past and future environments. *Ecological studies*. Springer.

Vaganov EA, Anchukaitis KJ, Evans MN (2011) Dendroclimatology: Progress and Prospects. In: How Well Understood Are the Processes that Create Dendroclimatic Records? A Mechanistic Model of the Climatic Control on Conifer Tree-Ring Growth Dynamics, pp 37–75 Springer Netherlands, Dordrecht

Vieten A, Vanneste S, Wisniewska J, Benková E, Benjamins R, Beeckman T, Luschnig C, Friml J. 2005. Functional redundancy of PIN proteins is accompanied by auxin-dependent cross-regulation PIN expression. *Development* 132, 4521–4531.

Willis L, Refahi Y, Wightman R, Landrein B, Teles J, Huang KC, Meyerowitz EM, Jonsson H. 2016. Cell size and growth regulation in the *Arabidopsis thaliana* apical stem cell niche. *Proceedings of the National Academy of Sciences, USA* 113, 8238–8246.

Wilson BF. 1984. *The Growing Tree*. University of Massachusetts Press.

Yeoman MM, Brown R. 1971. Effects of Mechanical Stress on the Plane of Cell Division in Developing Callus Cultures. *Annals of Botany* 35, 1102–1112.

Ziaco E, Biondi F, Rossi S, Deslauriers A. 2016. Environmental drivers of cambial phenology in Great Basin bristlecone pine. *Tree Physiology* 36, 818–831

Table 1: **Parameters of the model, with their value.**

| <b>Symbol</b> | <b>Value</b>         | <b>Unit</b>                         | <b>Description</b>                                                                                              |
|---------------|----------------------|-------------------------------------|-----------------------------------------------------------------------------------------------------------------|
| $N_0$         | 6                    | unitless                            | Initial number of cells in the file.                                                                            |
| $L_0$         | 6                    | $\mu\text{m}$                       | Initial size of the cells.                                                                                      |
| $T_d$         | 2                    | unitless                            | Division threshold.                                                                                             |
| $T_e$         | 1.6                  | unitless                            | Enlargement threshold.                                                                                          |
| $k_g$         | 0.06                 | $\text{s}^{-1}$                     | Prefactor relating signal concentration to cell growth rate.                                                    |
| $\delta_D$    | 10                   | $\mu\text{m}^2 \cdot \text{s}^{-1}$ | Diffusion coefficient of signal D.                                                                              |
| $\mu_D$       | $10^{-2}$            | $\text{s}^{-1}$                     | Decay rate of signal D.                                                                                         |
| $\mu_G$       | $10^{-5}$            | $\text{s}^{-1}$                     | Decay rate of signal G.                                                                                         |
| $q$           | $1.5 \times 10^{-3}$ | $\mu\text{m} \cdot \text{s}^{-1}$   | Permeability rate of the membranes to signal G.                                                                 |
| $k_p$         | $4 \cdot 10^{-23}$   | unitless                            | Proportionality coefficient between the concentration of signal G in a cell and the amount of PIN in this cell. |

Figure 1: **Schematic layout of a XyDyS simulation.** Signals D and G form concentration gradients (respectively blue and red dots) which impose cell identities and growth rates. Cells with a concentration of signal D above the division threshold ( $T_{div}$ ) have the ability to divide. Cells with a concentration of signal G above the enlargement threshold ( $T_{enl}$ ) are growing, with a growth rate related to the concentration of signal G. Carrier proteins transporting signal G toward the xylem are present only in cells that have the ability to divide. The zonation is based on cell identity and geometry. Cambial zone (green): small ( $L_i < 2L_{init}$ ) growing cells. Enlargement zone (blue): large ( $L_i > 2L_{init}$ ) growing cells. Thickening zone and mature zone (red): non-growing cells.

Figure 2: **Concentrations of signals D and G imposed at the cambium boundary over a growing season.**

Figure 3: **Establishment of signal gradients.** (a) At the beginning of the growing season, signal D (blue dots) is above the division threshold in every cell. Signal G (red dots) is transported toward the xylem and accumulates at the xylem end of the cell file. (b) After the file has grown longer, both signals reach a stationary gradient. The concentration of signal G peaks around the boundary between the cambial and enlargement zones. (c) Near the end of the growing season, the supply of signal is very low.

Figure 4: **Evolution of the number of cambial and enlarging cells over a growing season.** (a) As simulated by the XyDyS model. (b) From observations on silver firs (*Abies alba*) in the Vosges Mountains (France) reported in Cuny et al. (2014).

Figure 5: **Cumulative radial growth of a tree ring.** (a) As simulated by XyDyS; and (b) as fitted from microcore measurements on Scots pines (*Pinus sylvestris*) growing in Fontainebleau forest, close to Paris (France) and reported in Michelot et al. (2012).

Figure 6: **Evolution of tracheid radial diameters along a mature tree ring.** (a) As simulated by XyDyS; and (b) as measured on a microcore of Scots pine (*Pinus sylvestris*) growing in the Vosges Mountains (France). Data courtesy from Henri Cuny.

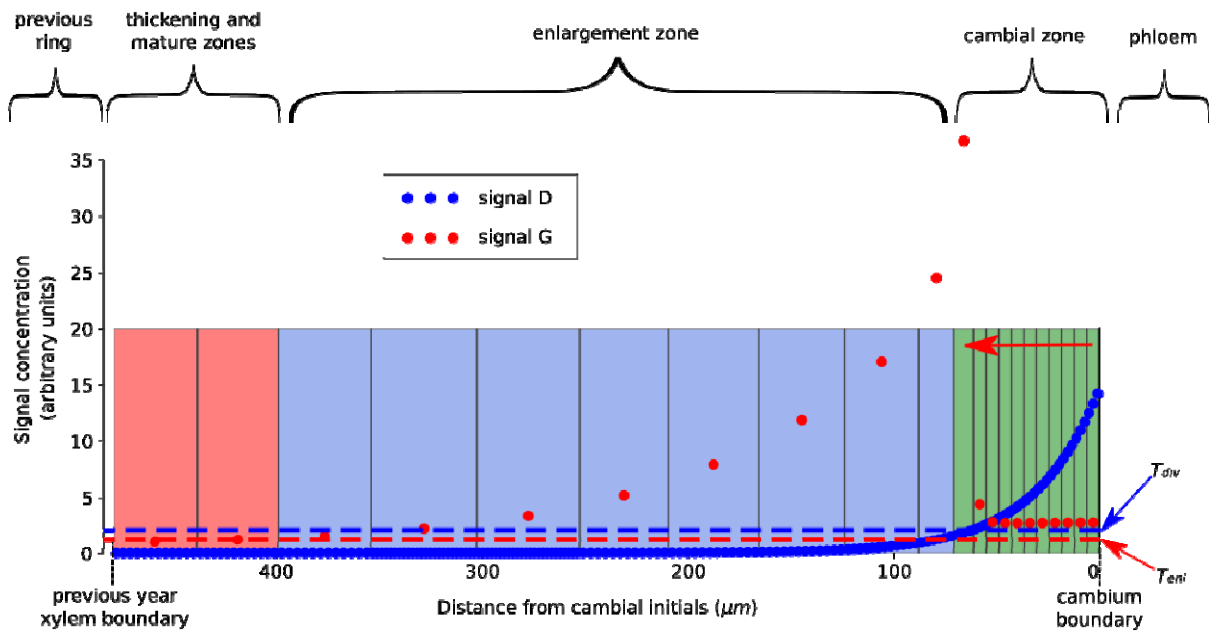

345



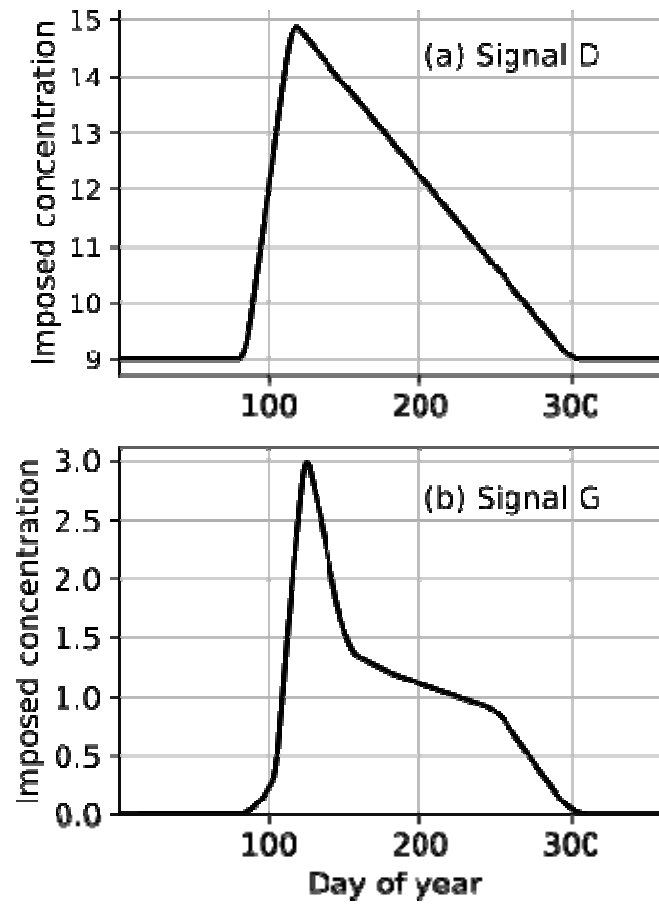

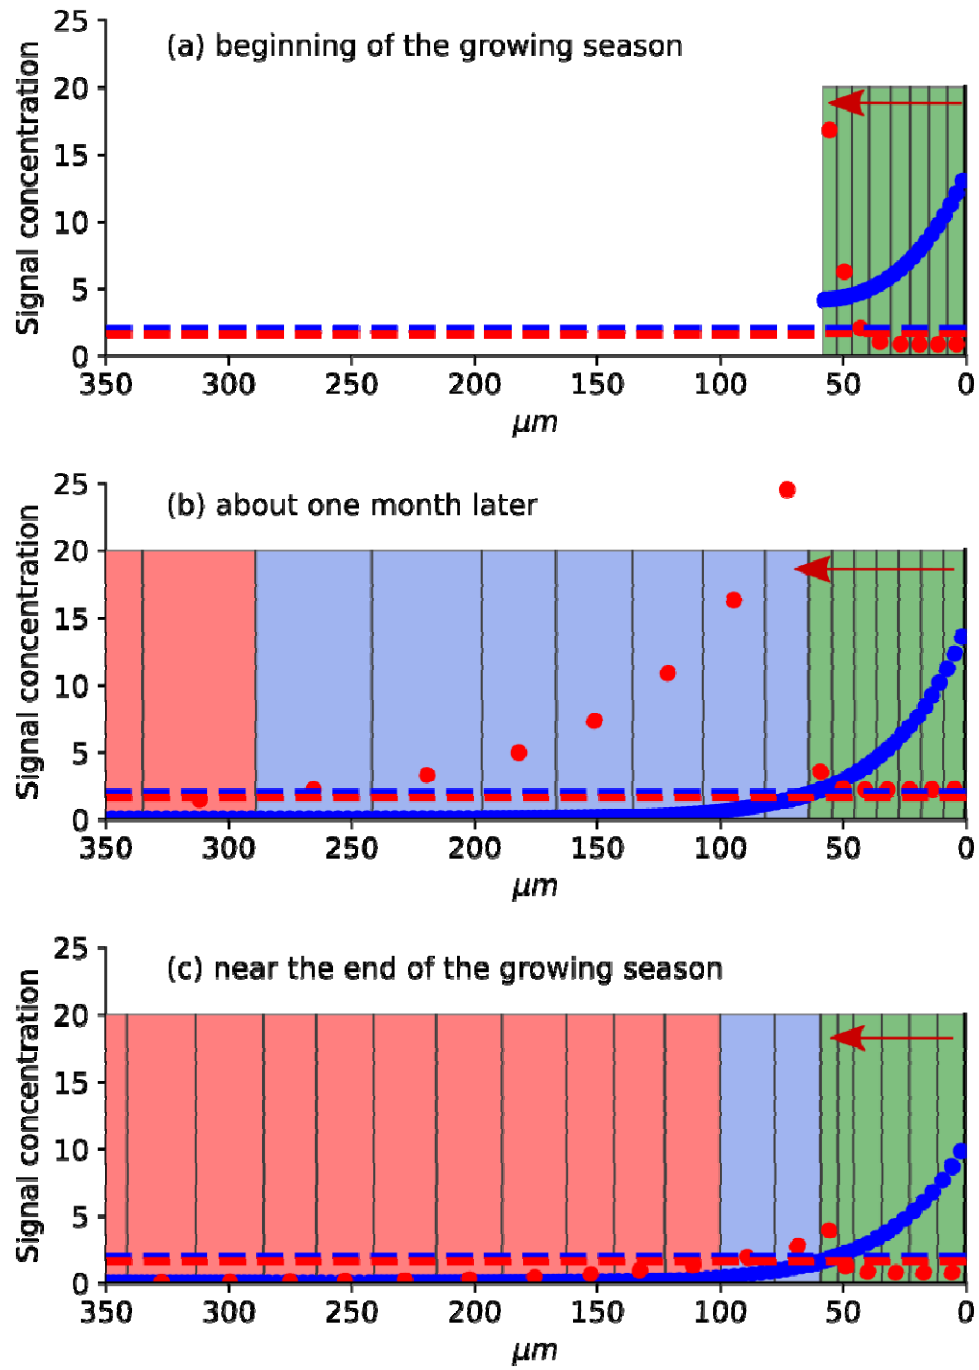

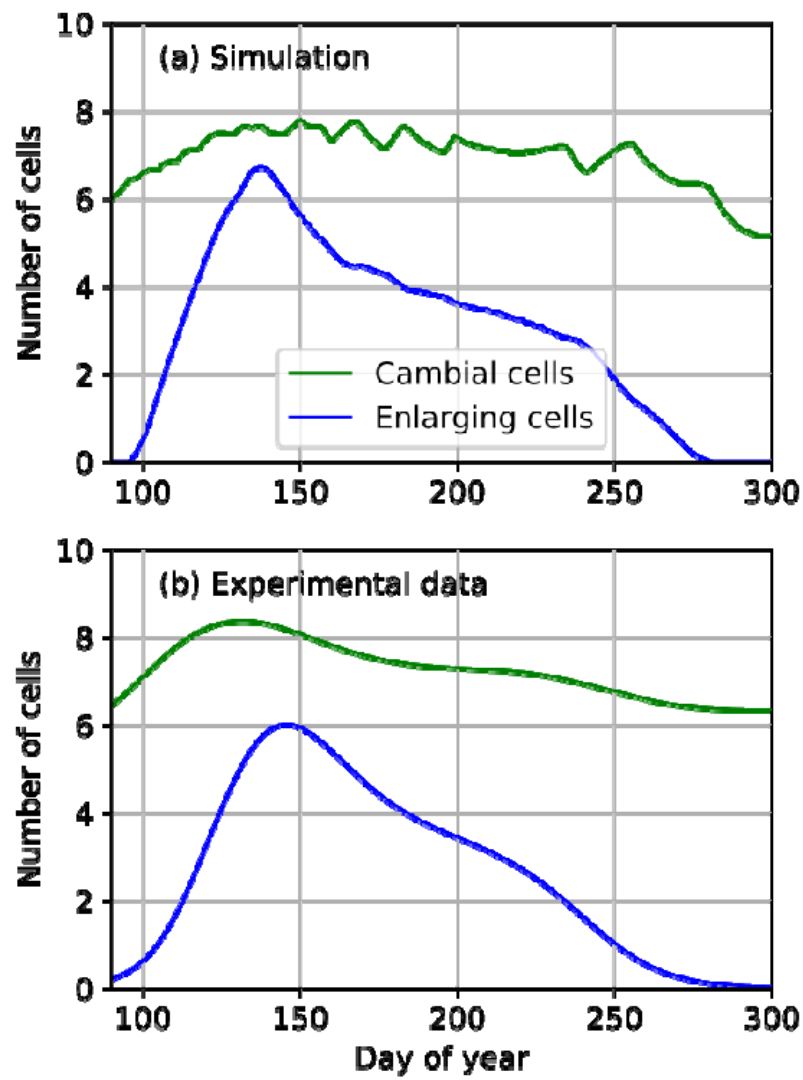

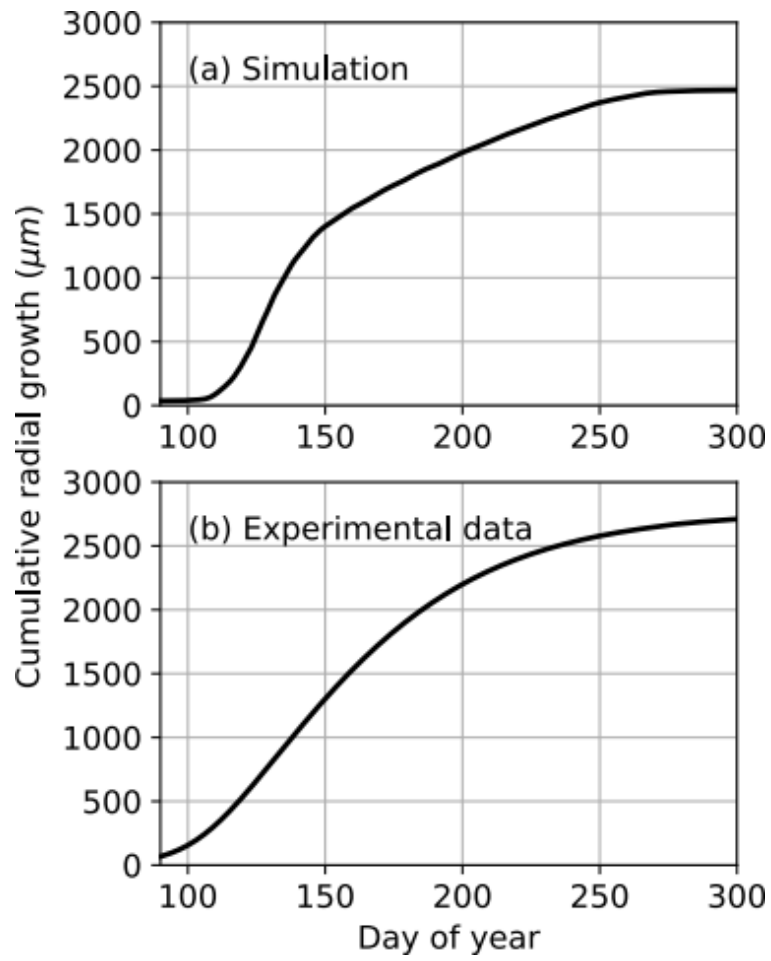

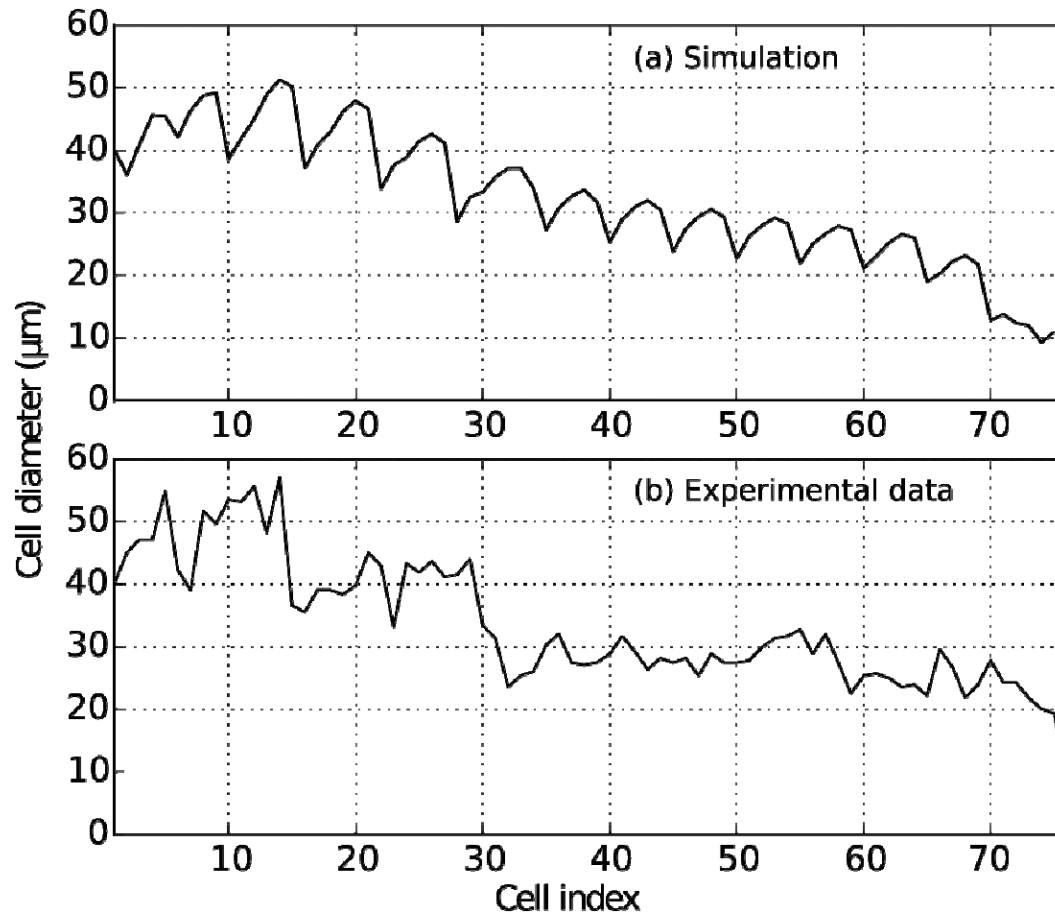

Source: https://www.biorxiv.org/content/10.1101/2020.04.01.019638v1.full.pdf
